# Supplementary material for: Free and bioavailable 25-hydroxyvitamin D thresholds for bone metabolism and their associations with metabolic syndrome in Chinese women of childbearing age
Source: Frontiers journal article supplement (doi:10.3389/fnut.2023.1131140), 2023-08-31
Supplement: Data_Sheet_1.PDF [file Data_Sheet_1.PDF]

## Supplementary Material

# Free and bioavailable 25-hydroxyvitamin D thresholds for bone metabolism and their associations with metabolic syndrome in Chinese women of childbearing age

Xiaoyun Shan<sup>1,2</sup>, Yang Cao<sup>2</sup>, Huidi Zhang<sup>2</sup>, Xiayu Zhao<sup>2</sup>, Siran Li<sup>2</sup>, Yichun Hu<sup>2</sup>, Lichen Yang<sup>2\*</sup>

\* Correspondence: Lichen Yang, yanglc@ninh.chinacdc.cn

## 1 Supplementary Figures and Tables

### 1.1 Supplementary Figures

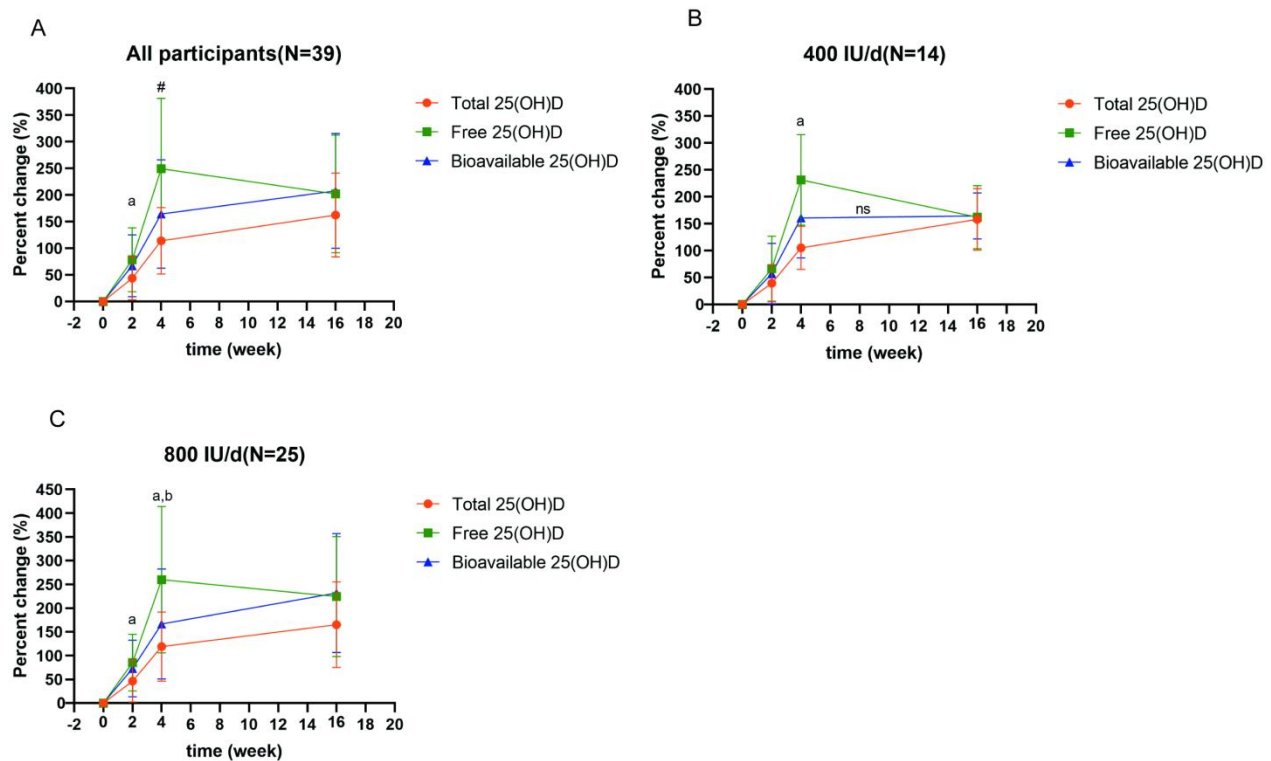

**Supplementary Figure 1.** Total-25(OH)D, Free-25(OH)D, and Bio-25(OH)D response to vitamin D supplementation. <sup>#</sup>, compared with other two indicators; a, Free-25(OH)D vs. Total-25(OH)D; b, Free-25(OH)D vs. Bio-25(OH)D; ns, no difference between week 4 and week 16 for Bio-25(OH)D. Repeated measures analysis of variance was used to compare means between the groups of interest.  $P < 0.05$  was considered statistically significant.
